# Supplementary material for: Ursolic acid derivatives are potent inhibitors against porcine reproductive and respiratory syndrome virus
Source: Royal Society of Chemistry journal article supplement (doi:10.1039/d0ra04070c), 2020-01-01
Supplement: d0ra04070c1.pdf [file d0ra04070c1.pdf]

## Ursolic Acid Derivatives Are Potent Inhibitors Against Porcine Reproductive and Respiratory Syndrome Virus

Yang Chen <sup>a, #</sup>, Hui Li <sup>c, #</sup>, Li Wu <sup>a, b</sup>, Mingxin Zhang <sup>a</sup>, Yarou Gao <sup>a</sup>, Heng Wang <sup>a, b</sup>, Dan Xu <sup>a, b</sup>, Weisan Chen <sup>d</sup>, Gaopeng Song <sup>b, c, \*</sup>, and Jianxin Chen <sup>a, b, \*</sup>

### Supplementary information:

<sup>1</sup>H NMR and <sup>13</sup>C NMR spectra of compounds **23** and **7-15**.

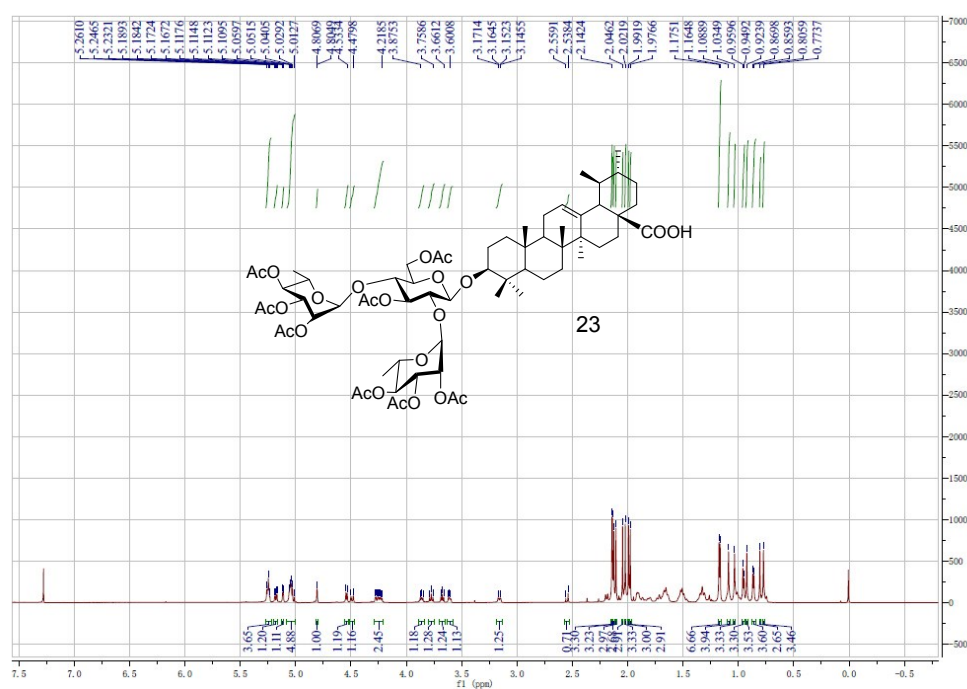

<sup>1</sup>H NMR spectra of compound **23**

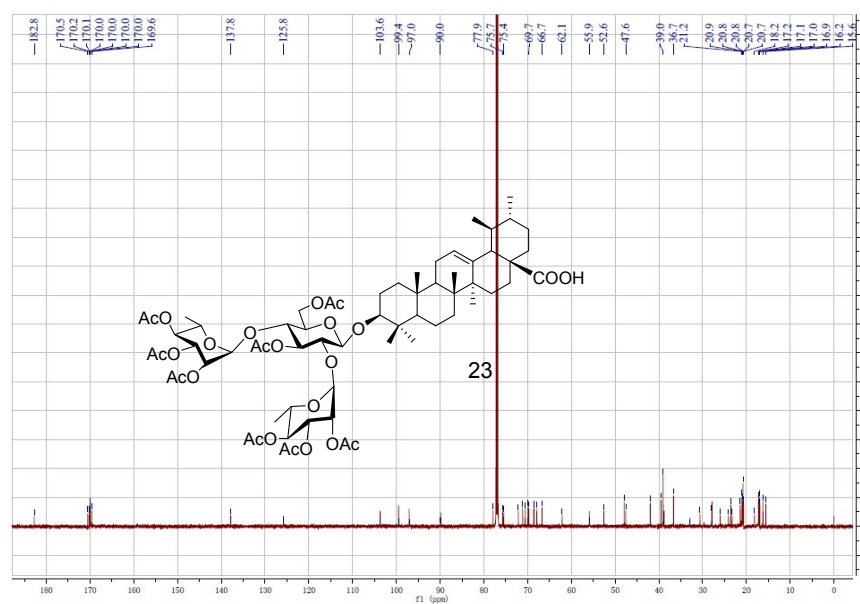

<sup>13</sup>C NMR spectra of compound **23**

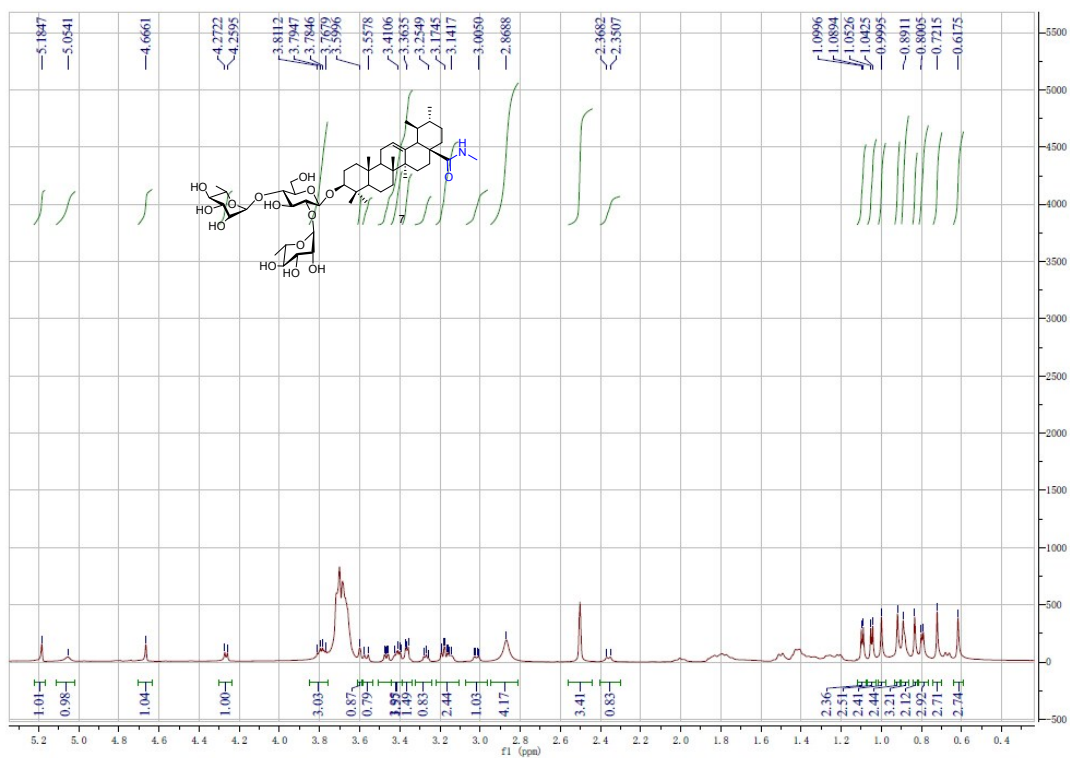

<sup>1</sup>H NMR spectra of compound 7

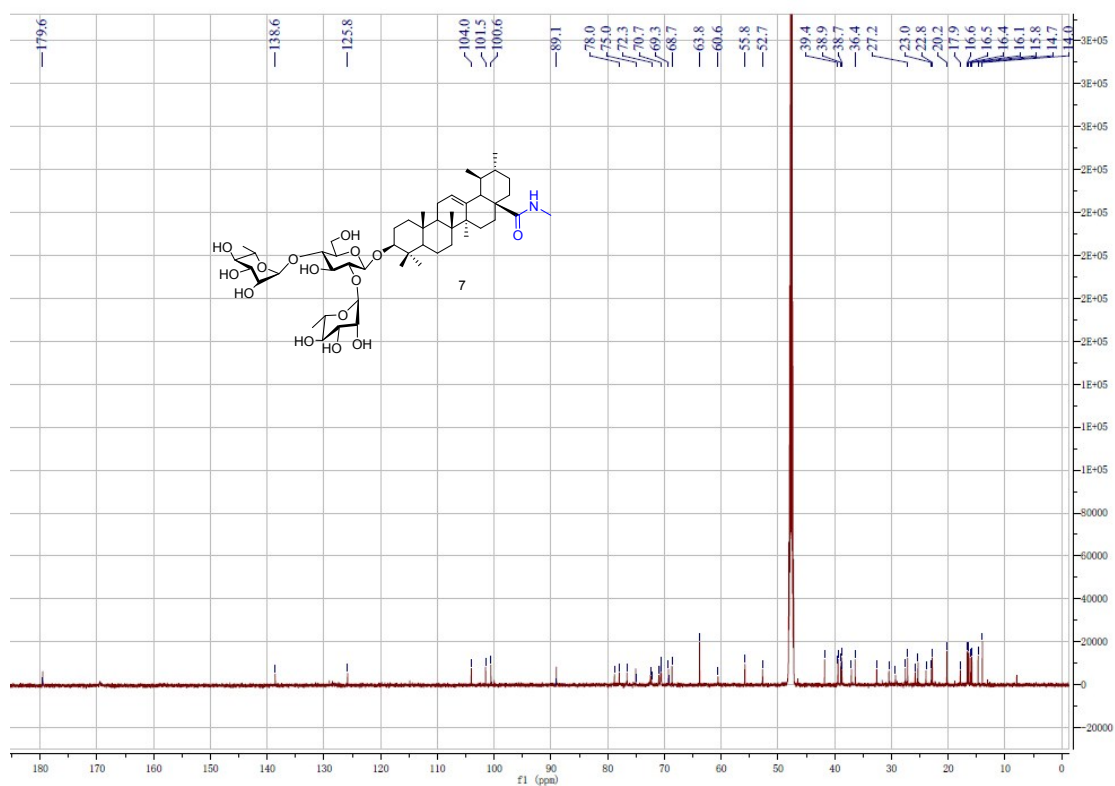

<sup>13</sup>C NMR spectra of compound 7

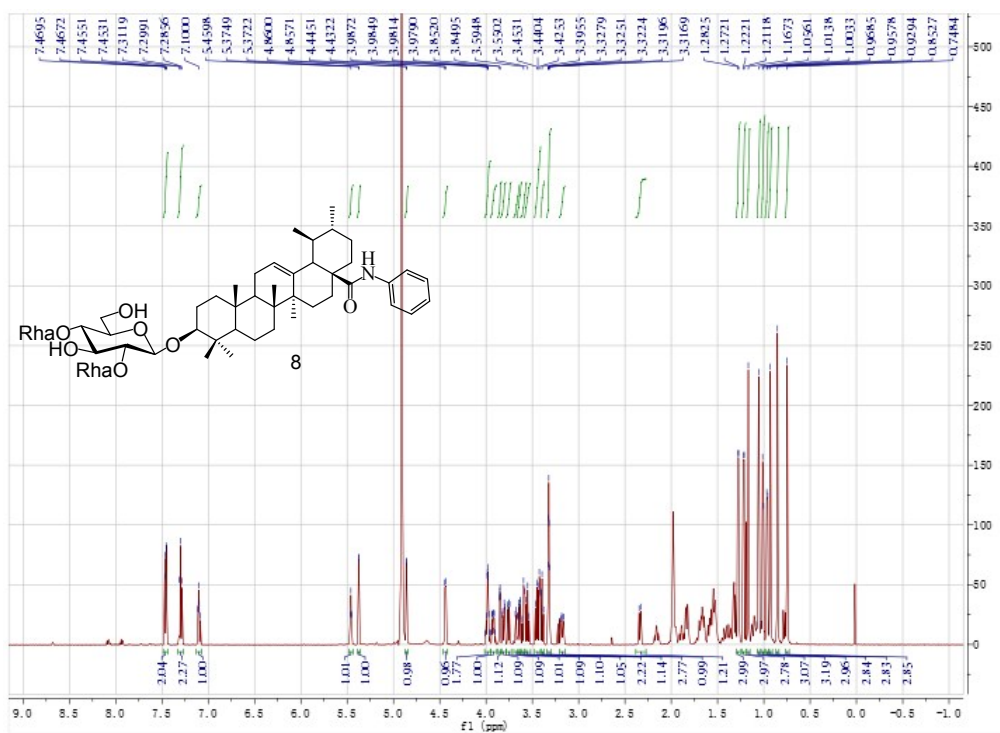

<sup>1</sup>H NMR spectra of compound 8

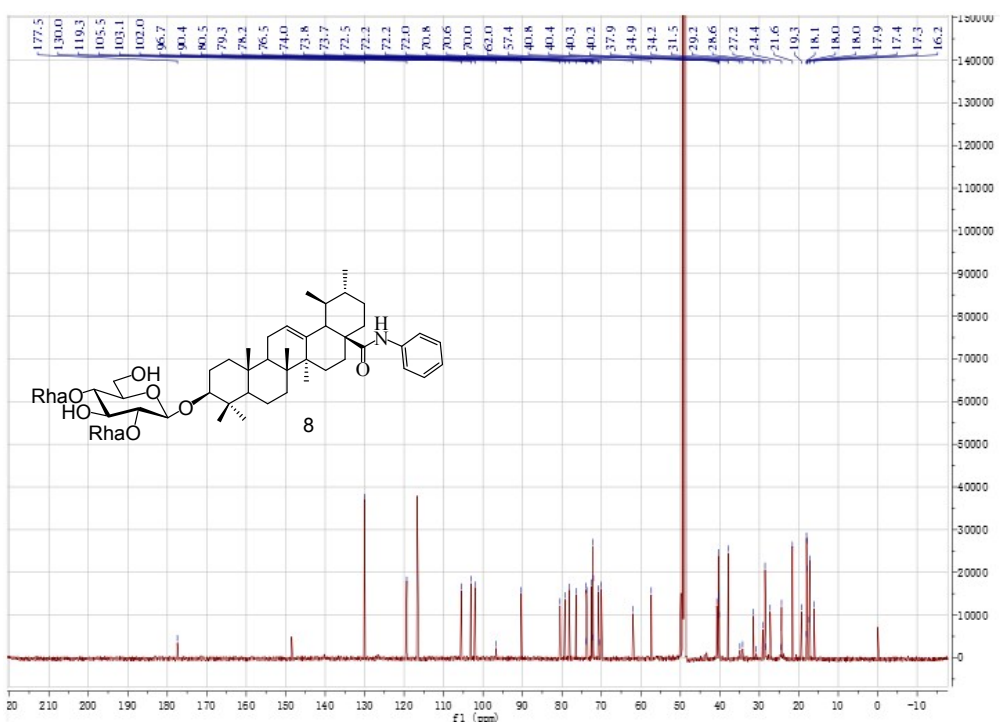

<sup>13</sup>C NMR spectra of compound 8

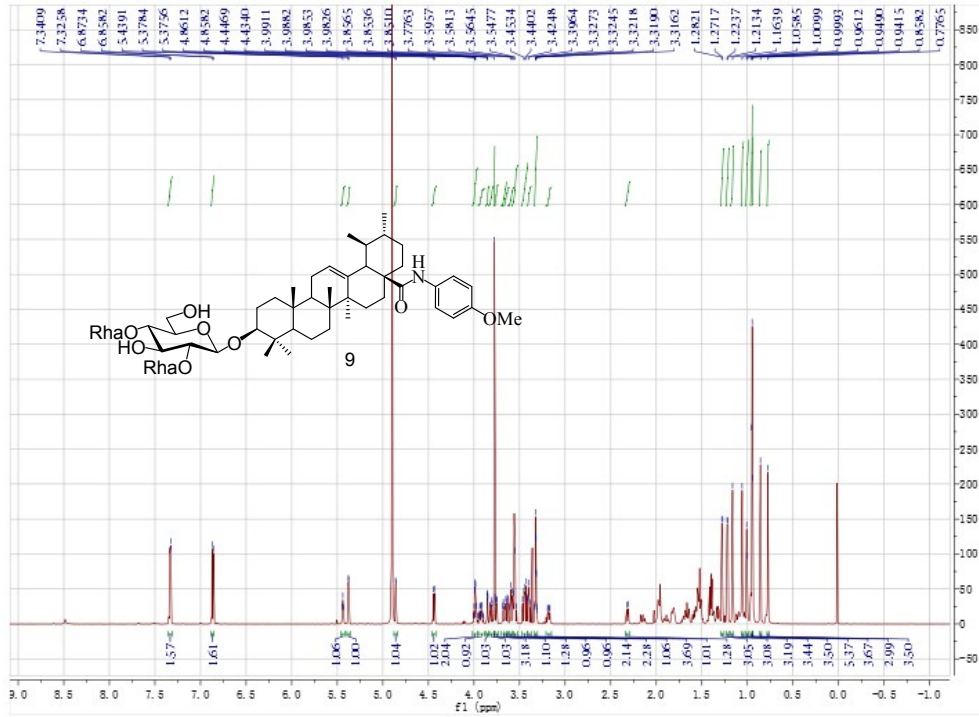

$^1\text{H}$  NMR spectra of compound 9

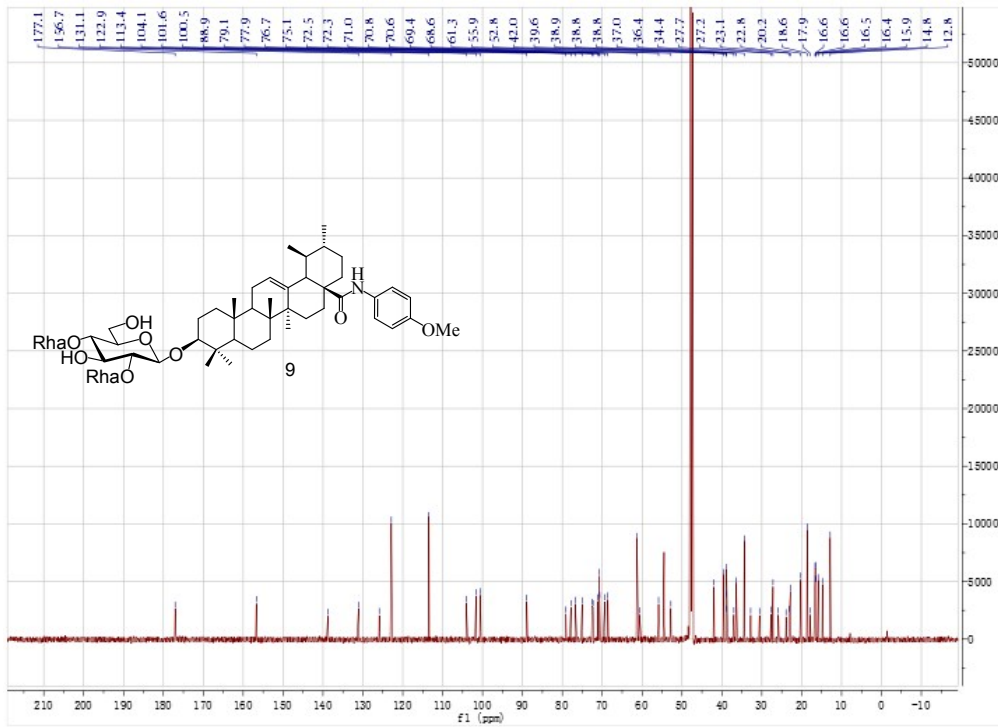

$^{13}\text{C}$  NMR spectra of compound 9

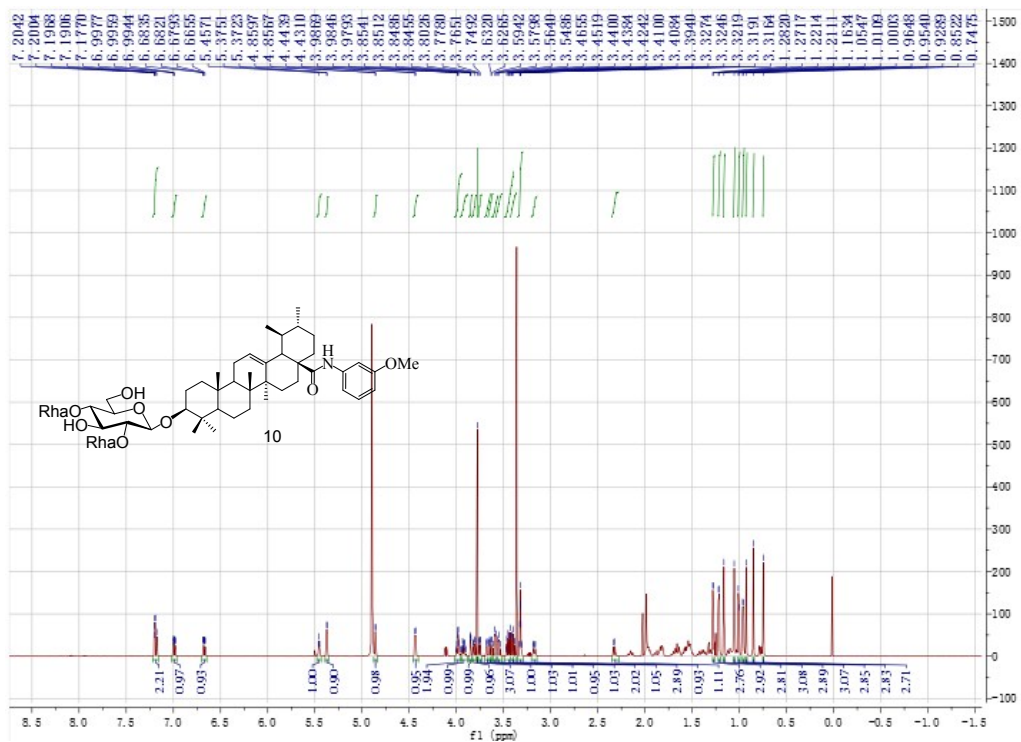

<sup>1</sup>H NMR spectra of compound 10

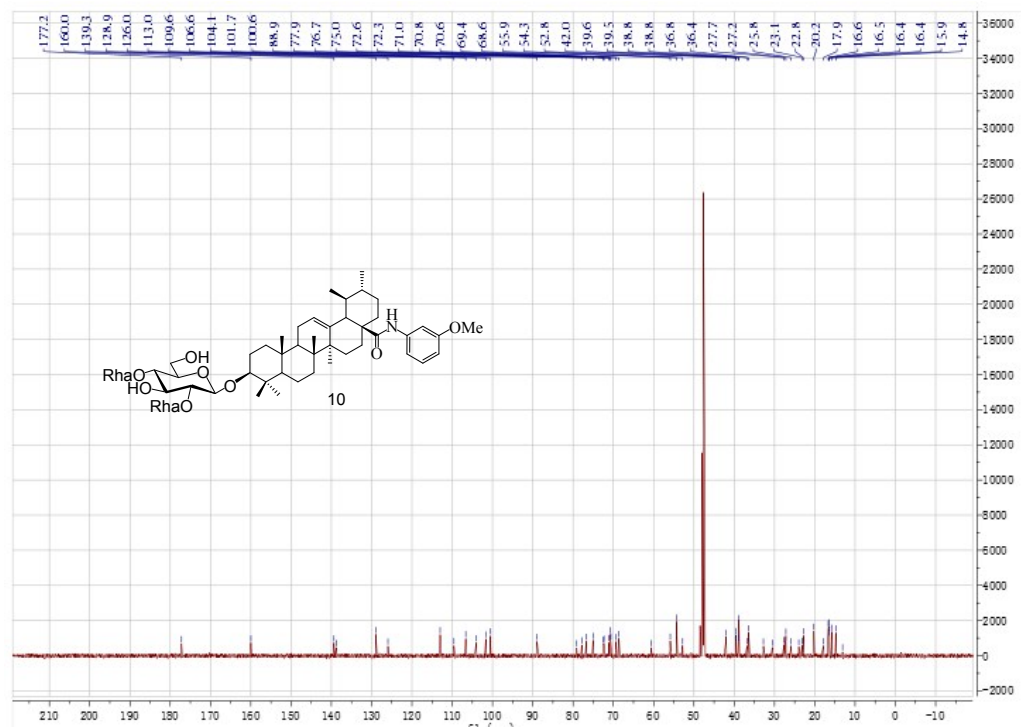

<sup>13</sup>C NMR spectra of compound 10

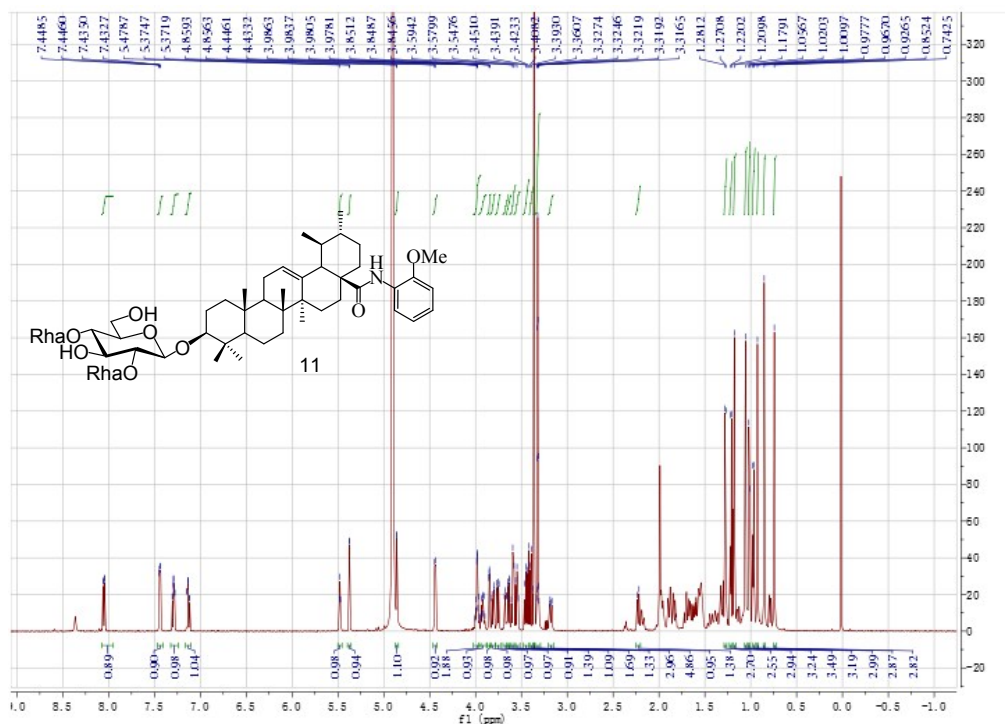

<sup>1</sup>H NMR spectra of compound 11

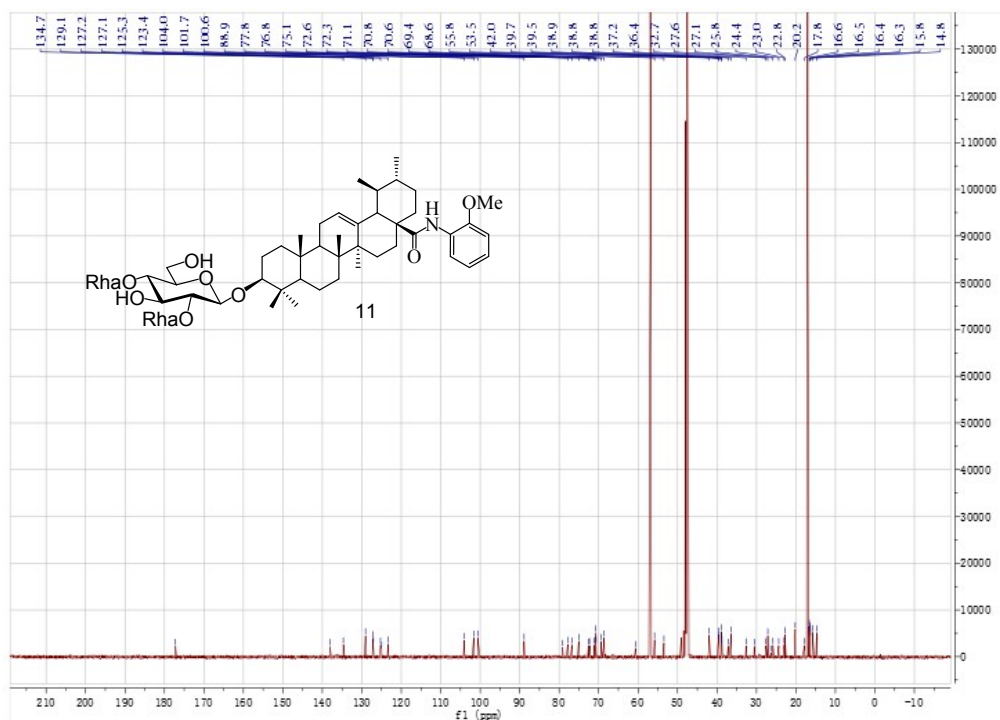

<sup>13</sup>C NMR spectra of compound 11

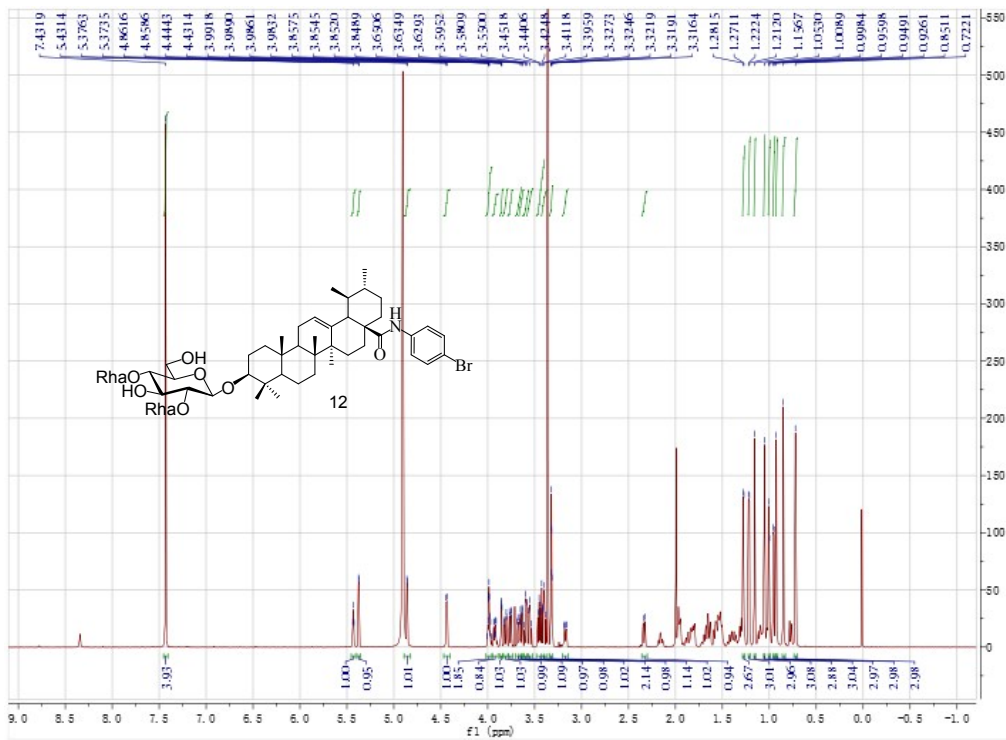

<sup>1</sup>H NMR spectra of compound 12

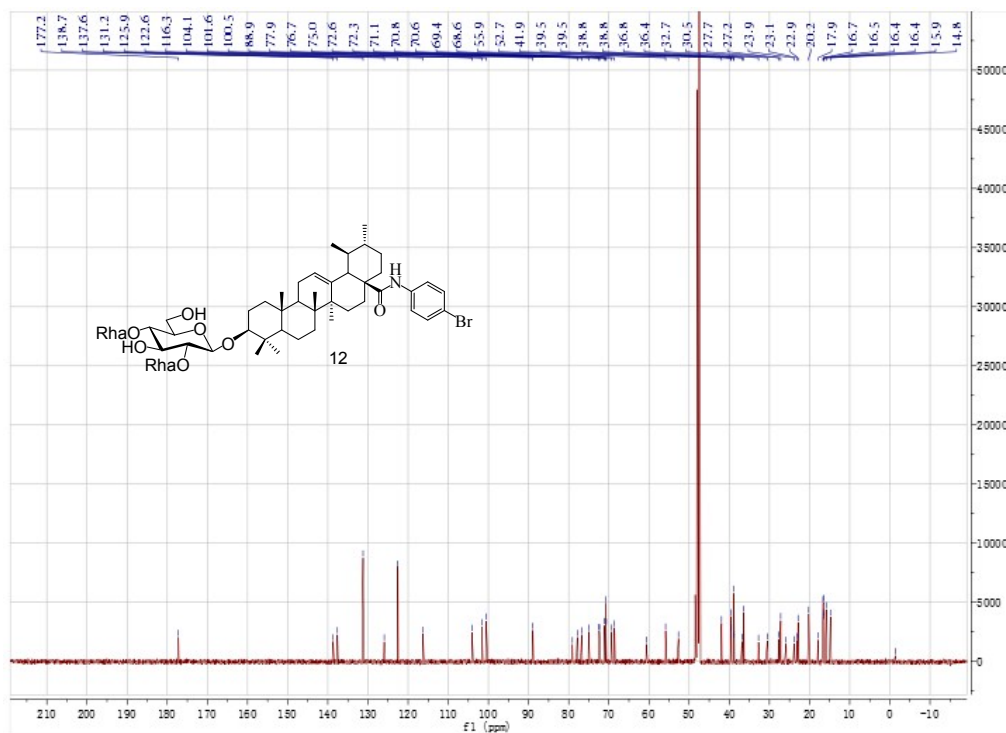

<sup>13</sup>C NMR spectra of compound 12

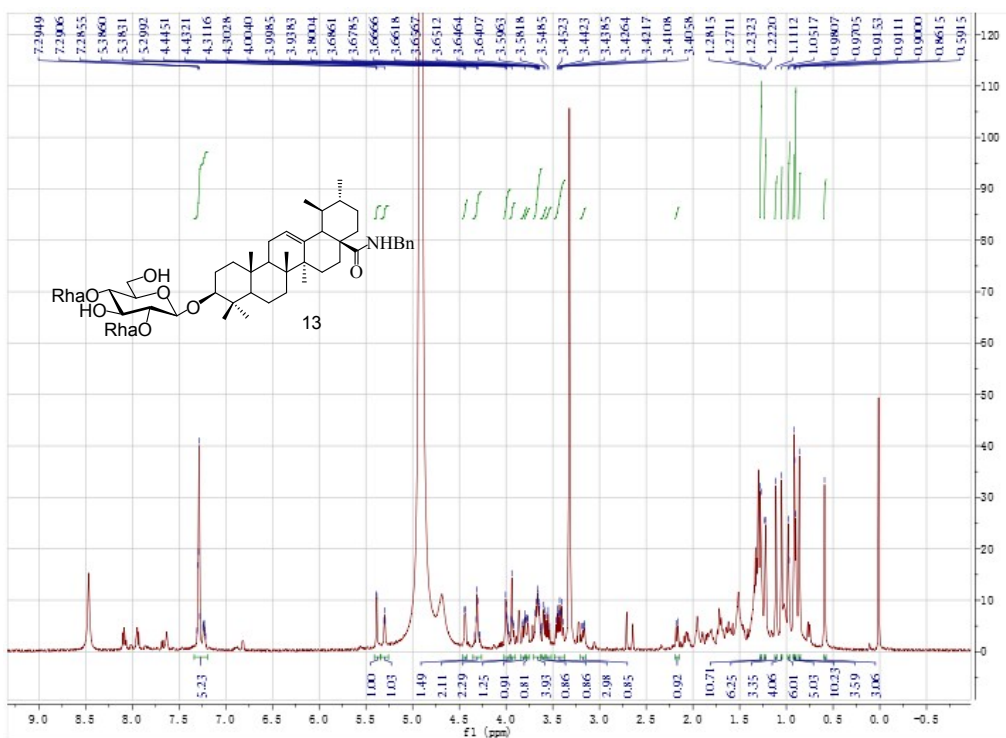

<sup>1</sup>H NMR spectra of compound 13

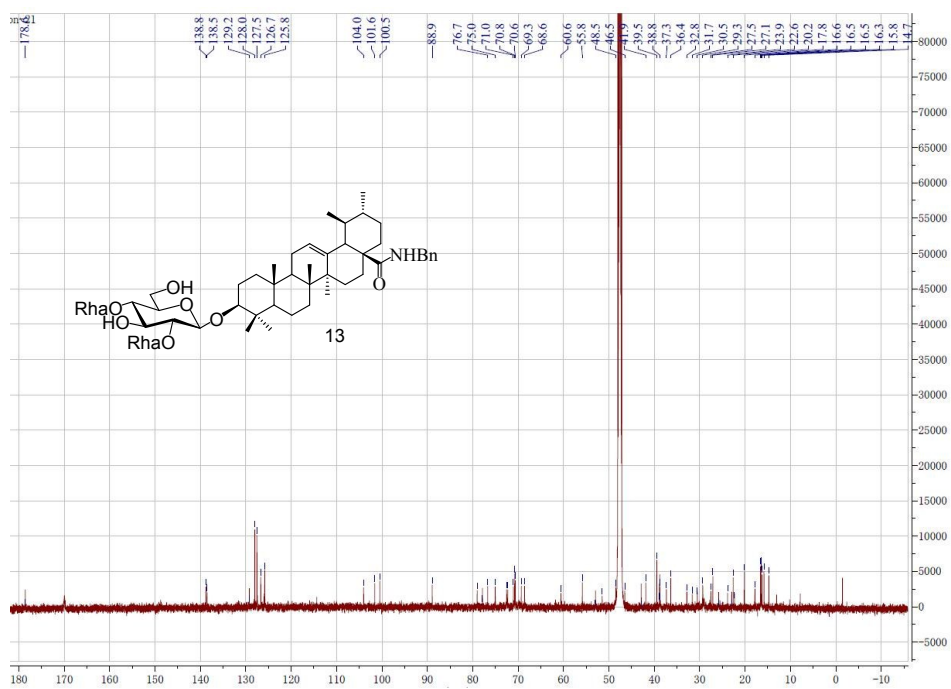

<sup>13</sup>C NMR spectra of compound 13



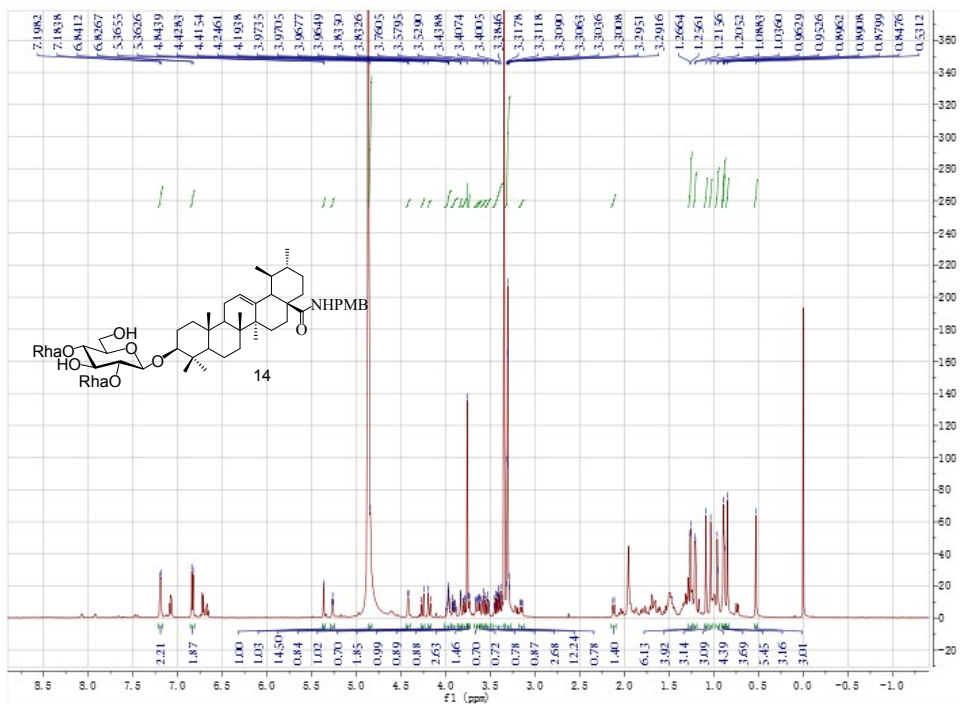

<sup>1</sup>H NMR spectra of compound 14

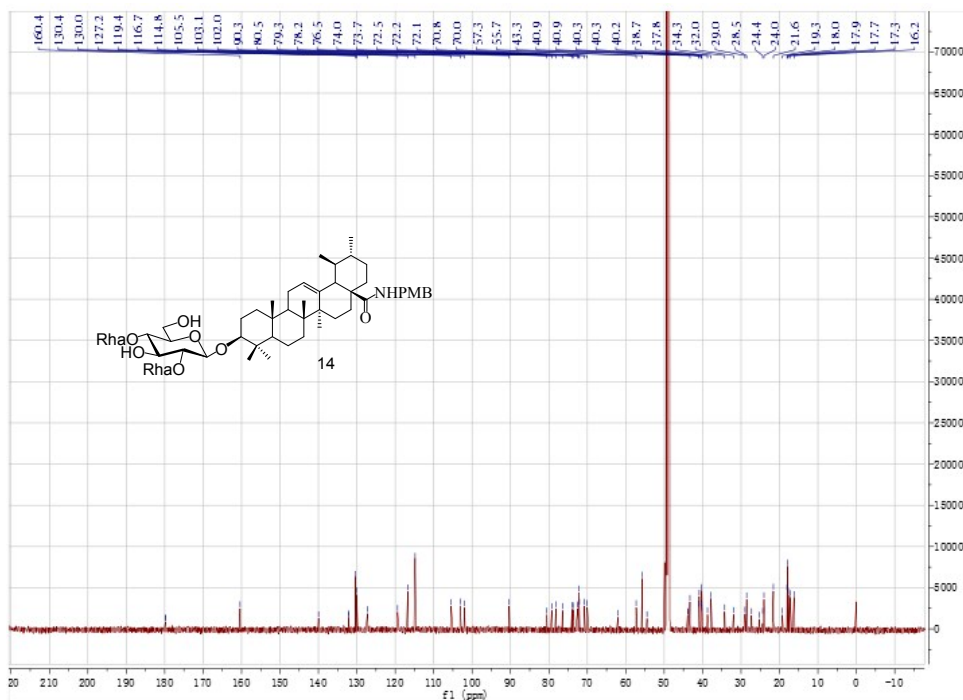

<sup>13</sup>C NMR spectra of compound 14

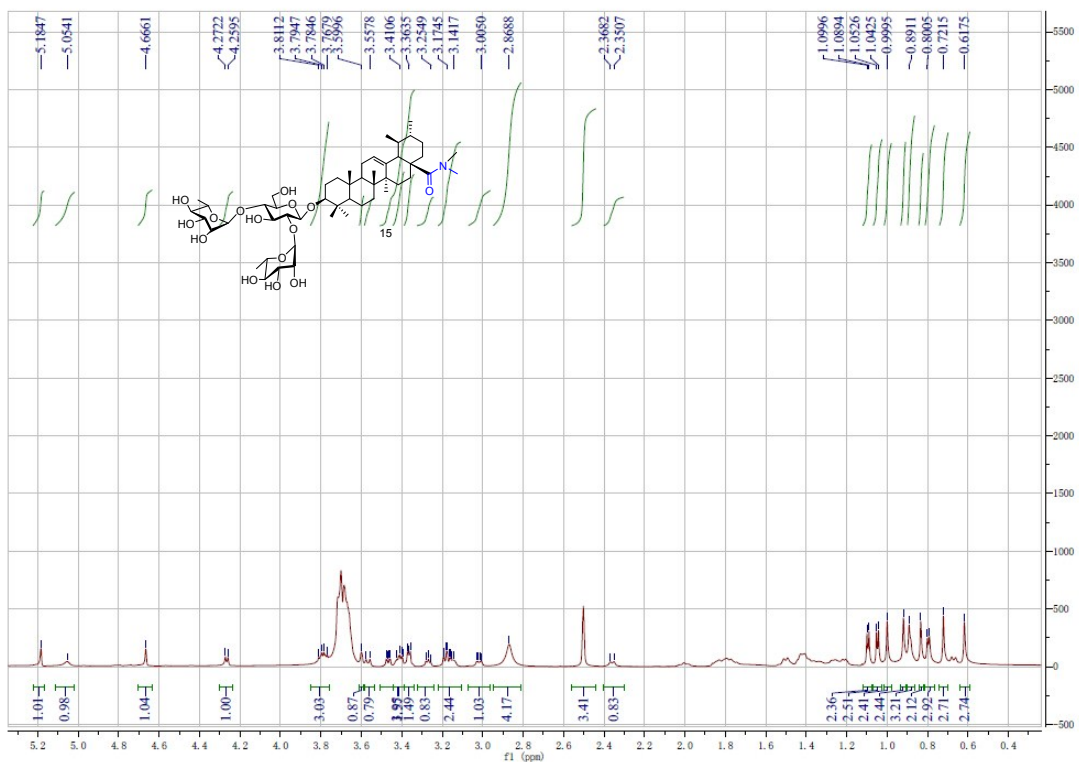

<sup>1</sup>H NMR spectra of compound 15

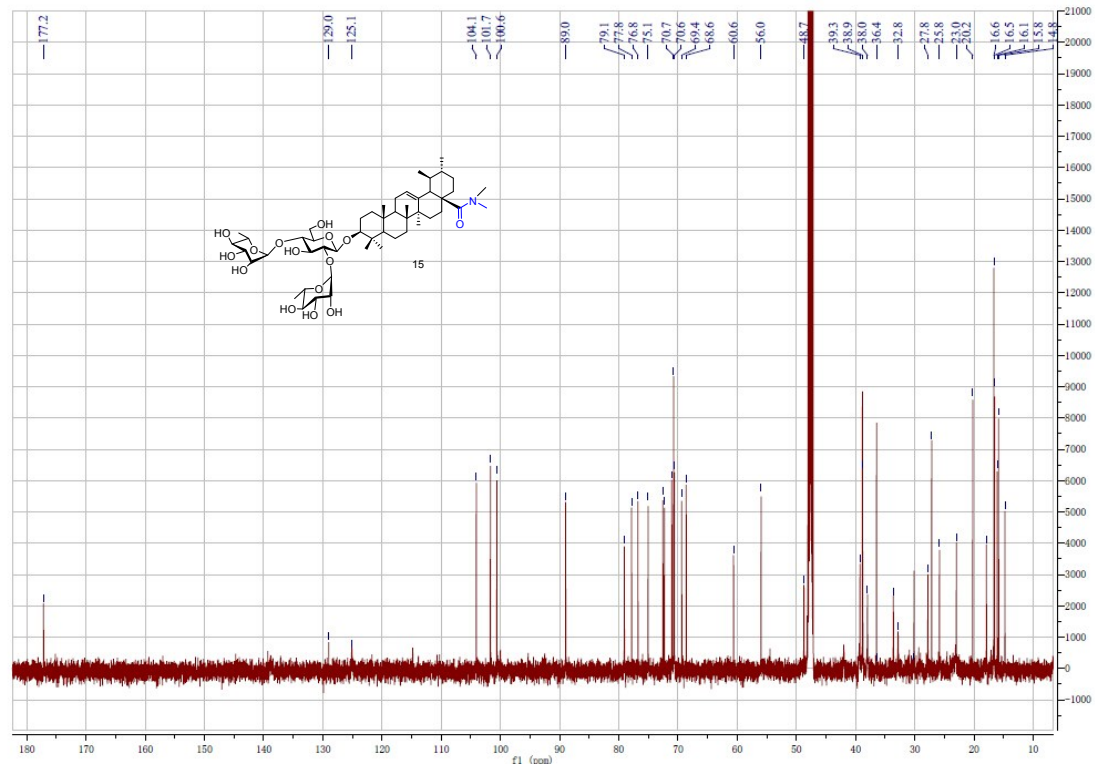

<sup>13</sup>C NMR spectra of compound 15
